# Supplementary material for: Laser-induced pinpoint hydrogen evolution from benzene and water using metal free single-walled carbon nanotubes with high quantum yields
Source: PubMed Central journal article supplement (PMC5590240; doi:10.1039/c4sc02269f), 2014-09-09
Supplement: SC-006-C4SC02269F-s001.pdf [file SC-006-C4SC02269F-s001.pdf]

## Electronic Supplementary Information

### **Laser-induced pinpoint hydrogen evolution from benzene and water using metal free single-walled carbon nanotubes with high quantum yields**

Kei Ohkubo, Naoki Kohno, Yusuke Yamada and Shunichi Fukuzumi\*

Department of Material and Life Science, Graduate School of Engineering, Osaka University, ALCA, Japan Science and Technology Agency (JST), Suita, Osaka 565-0871, Japan

E-mail: [fukuzumi@chem.eng.osaka-u.ac.jp](mailto:fukuzumi@chem.eng.osaka-u.ac.jp)

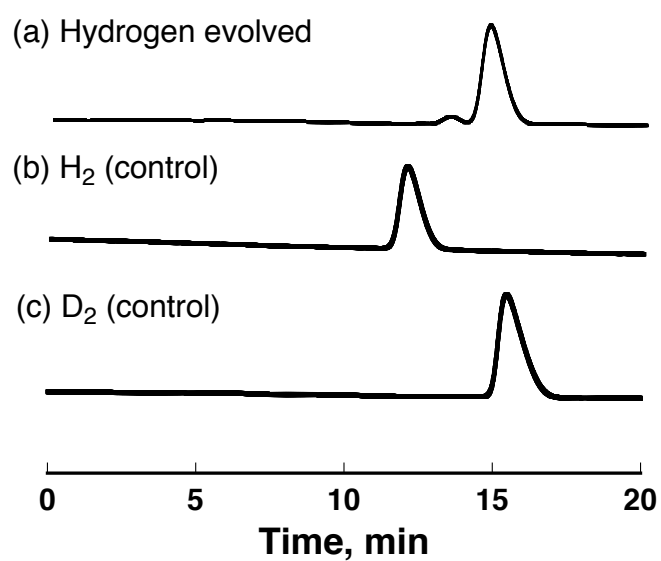

**Fig. S1** GC charts of evolved hydrogen after laser light irradiation ( $\lambda = 532$  nm; 50 mJ pulse<sup>-1</sup>; 10 Hz) of a benzene-*d*<sub>6</sub> solution (2.5 mL) containing SWCNTs (0.15 mg) for 2 h, b) H<sub>2</sub> and c) D<sub>2</sub> as control experiments.

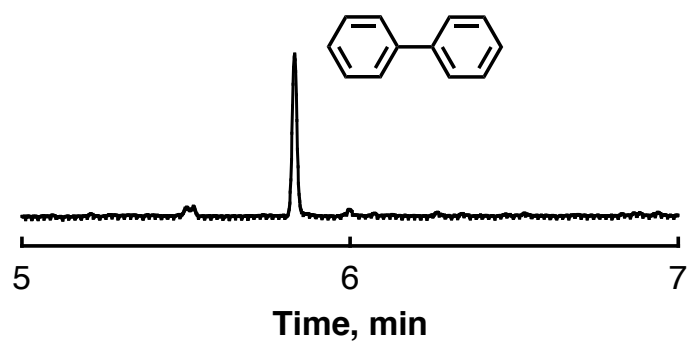

**Fig. S2** GC-MS chart of benzene solution (2.5 mL) containing SWCNTs (0.15 mg) after 2 h laser irradiation ( $\lambda = 532 \text{ nm}$ ;  $50 \text{ mJ pulse}^{-1}$ ; 10 Hz).

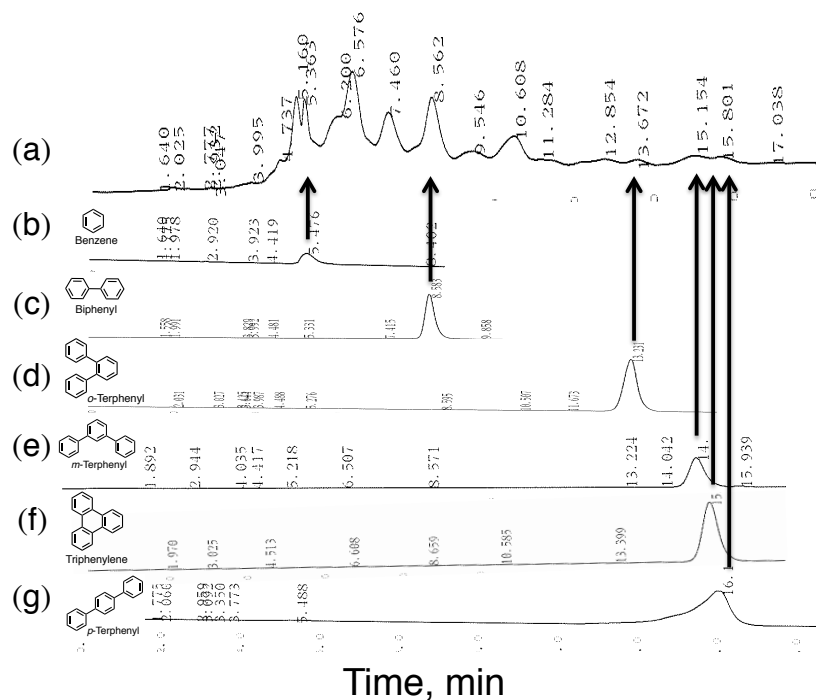

**Fig. S3** HPLC charts of a) benzene solution (2.5 mL) containing SWCNTs (0.15 mg) after 2 h laser irradiation ( $\lambda = 532 \text{ nm}$ ;  $50 \text{ mJ pulse}^{-1}$ ;  $10 \text{ Hz}$ ), b) benzene, c) biphenyl (2 mM in  $\text{CH}_3\text{CN}$ ), d) *o*-terphenyl (2 mM in  $\text{CH}_3\text{CN}$ ), e) *m*-terphenyl (2 mM in  $\text{CH}_3\text{CN}$ ), f) triphenylene (2 mM in  $\text{CH}_3\text{CN}$ ) and g) *p*-terphenyl (2 mM in  $\text{CH}_3\text{CN}$ ).

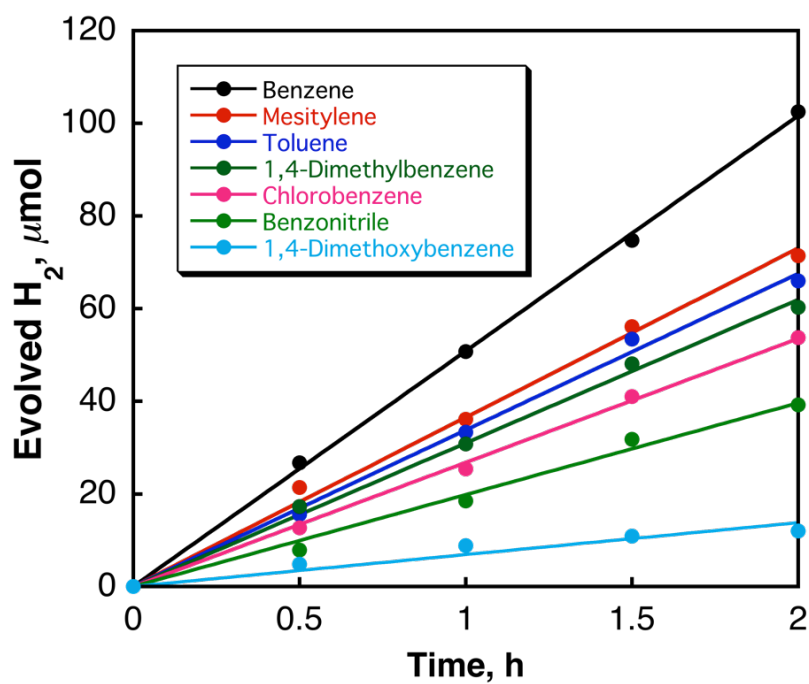

**Fig. S4** Time courses of the amount of H<sub>2</sub> evolved under laser light irradiation ( $\lambda = 532$  nm; 50 mJ pulse<sup>-1</sup>; 10 pulse s<sup>-1</sup>) in benzene (black), toluene (blue) mesitylene (red), *p*-xylene (green), chlorobenzene (pink), benzonitrile (light green), and 1,2-dimethoxybenzene (light blue) solutions (2.5 mL) containing SWCNTs (0.15 mg).

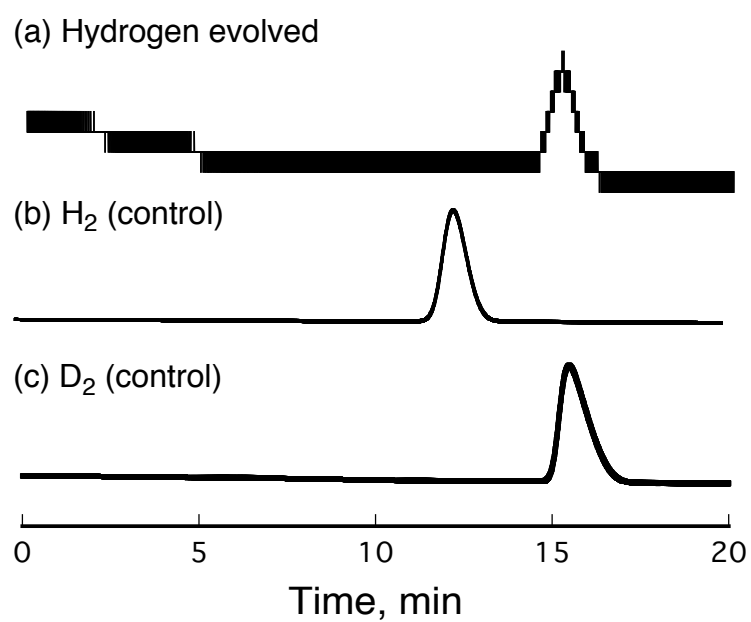

**Fig. S5** GC charts of (a) evolved hydrogen after laser light irradiation ( $\lambda = 532$  nm;  $60$   $\text{mJ pulse}^{-1}$ ;  $10$  Hz) of a  $\text{D}_2\text{O}$  solution ( $2.5$  mL) containing SWCNTs ( $2.0$  mg) for  $2$  h, (b)  $\text{H}_2$  and (c)  $\text{D}_2$  as control experiments.

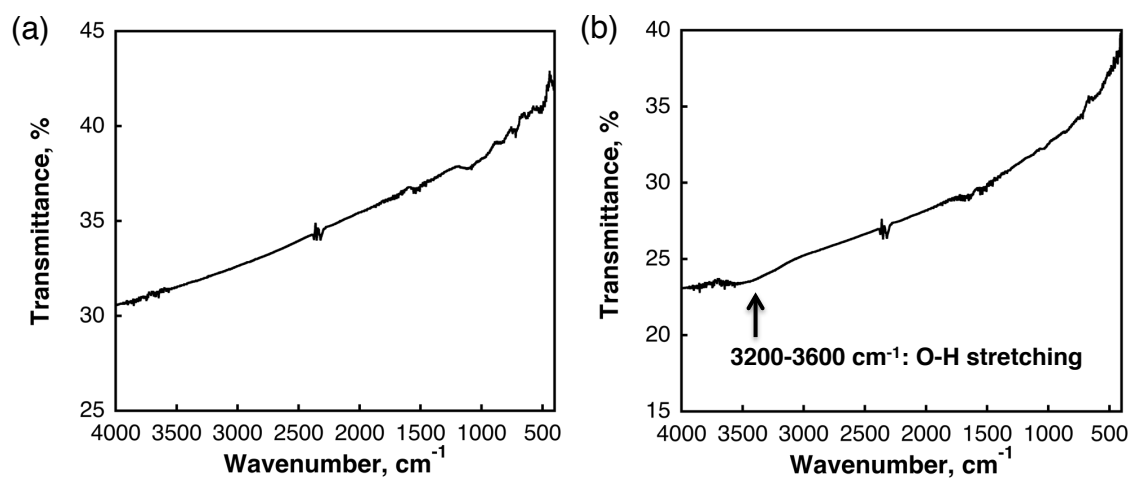

**Fig. S6** IR spectra of (a) SWCNTs before laser irradiation and (b) SWCNTs obtained by laser light irradiation ( $\lambda = 532 \text{ nm}$ ;  $60 \text{ mJ pulse}^{-1}$ ;  $10 \text{ pulse s}^{-1}$ ) for 5 h in deaerated water (2.0 mg, 2.5 mL).

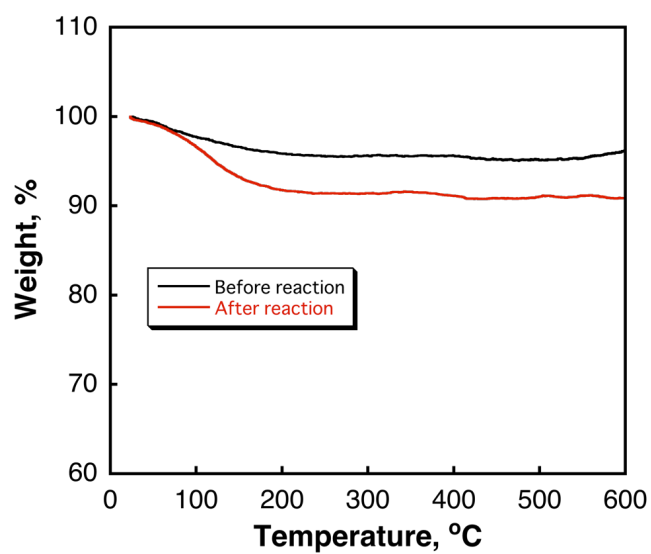

**Fig. S7** TG curves of SWCNTs before and after laser irradiation ( $H_2$  evolution) in water observed under deaerated conditions.
